# Supplementary material
Source: PubMed Central journal article supplement (PMC6730522)
Supplement: CJN.08250718SupplementaryData.pdf [file CJN.08250718SupplementaryData.pdf]

## **Secular Trends in Incidence, Modality and Mortality with Dialysis-Requiring AKI in Children in Ontario**

Rahul Chanchlani, MD, MSc<sup>1,2</sup>, Danielle M Nash, PhD<sup>3</sup>, Eric McArthur, MSc<sup>3</sup>, Michael Zappitelli, MD, MSc<sup>4</sup>, Victoria Archer, BA, BSc<sup>5</sup>, John Paul Kuwornu, PhD<sup>3</sup>, Amit X Garg, MD, PhD<sup>3</sup>, Jason Greenberg, MD<sup>6</sup>, Stuart L. Goldstein, MD<sup>7</sup>, Lehana Thabane, PhD<sup>2,8,9</sup>, Ron Wald, MD, MPH<sup>10</sup>

<sup>1</sup>Division of Pediatric Nephrology, Department of Pediatrics, McMaster Children Hospital, Hamilton, Canada

<sup>2</sup>Department of Health Research Methods, Evidence, and Impact, McMaster University, Hamilton, Canada

<sup>3</sup>ICES, Ontario, Canada

<sup>4</sup>Division of Pediatric Nephrology, Department of Pediatrics, Hospital for Sick Children, Toronto, Canada

<sup>5</sup>Michael DeGroote School of Medicine, McMaster University, Hamilton, Canada

<sup>6</sup>Division of Nephrology, Department of Pediatrics, Yale University, New Haven, Connecticut

<sup>7</sup>Center for Acute Care Nephrology, Cincinnati Children's Hospital, Ohio, United States

<sup>8</sup>Departments of Pediatrics, and Anesthesia, McMaster University Hamilton, Canada

<sup>9</sup>Biostatistics Unit, St Joseph's Healthcare—Hamilton, Hamilton, Canada

<sup>10</sup>Division of Nephrology, St. Michael's Hospital and University of Toronto, Toronto, Canada

### **Corresponding author:**

Dr. Rahul Chanchlani, Division of Pediatric Nephrology, Department of Pediatrics, McMaster Children's Hospital, Hamilton, Canada, Phone: 905-521-2100 ext 75635, Fax: 905-308-7548  
Email: [chanchlr@mcmaster.ca](mailto:chanchlr@mcmaster.ca)

**Short title: Dialysis-Receiving AKI Among Children**

**Supplemental Table of Contents:**

**Supplemental Table 1: ICES databases used for cohort creation, outcomes and baseline characteristics**

**Supplemental Table 2: Administrative data codes used in the study to identify children receiving dialysis for AKI**

**Supplemental Table 3: Proportion of neonates and children with dialysis-receiving AKI in various time-periods stratified by the cardiac surgery status**

**Supplemental Table 4: Most prevalent diagnoses during a hospital stay for children who received dialysis for AKI in Ontario between April 1, 1996 and March 31, 2015**

**Supplemental Table 5: Risk of 30-day mortality among hospitalized children after dialysis-receiving AKI stratified by dialysis modality**

**Supplemental Figure 1: Cohort creation for children to assess incidence of dialysis-receiving acute kidney injury for the fiscal year April 1, 2014 to March 31, 2015**

**Supplemental Figure 2: Incidence of dialysis-receiving acute kidney injury among total pediatric population between April 1, 1996 and March 31, 2015 in Ontario**

**Supplemental Figure 3: Incidence of dialysis-receiving acute kidney injury (defined using acute dialysis or access codes) among hospitalized neonates between April 1, 1996 and March 31, 2015 in Ontario**

**Supplemental Figure 4: Incidence of dialysis-receiving AKI (defined using only acute dialysis codes) among hospitalized children (n=1249) between April 1, 1996 and March 31, 2015 in Ontario**

**Supplemental Figure 5: Incidence of dialysis-receiving AKI (defined using acute dialysis or access codes) among hospitalized children not receiving cardiac surgery (n=1030) between April 1, 1996 and March 31, 2015 in Ontario**

**Supplemental Figure 6: Incidence of dialysis-receiving AKI (defined using AKI diagnosis combined with acute dialysis codes) among hospitalized children (n=455) between April 1, 1996 and March 31, 2015 in Ontario**

*Supplemental material is neither peer-reviewed nor thoroughly edited by CJASN. The authors alone are responsible for the accuracy and presentation of the material.*

**Supplemental Table 1: ICES databases used for cohort creation, outcomes and baseline characteristics**

| <b>Database</b>                               | <b>Details</b>                                                                                                                                                                               |
|-----------------------------------------------|----------------------------------------------------------------------------------------------------------------------------------------------------------------------------------------------|
| CIHI-DAD (Discharge Abstract Database)        | Contains information on acute hospitalizations, and was used to identify the presence of AKI, and receipt of acute dialysis, as well as in-patient comorbidities and procedures at baseline. |
| Registered Persons Database (RPDB)            | Contains health care identifiers and demographic information for or all eligible individuals in Ontario, as well as a date of death.                                                         |
| Ontario Health Insurance Plan (OHIP) database | Contains records of all physician billings for outpatient and inpatient services in the province.                                                                                            |
| Canadian Organ Replacement Register (CORR)    | Contains information on chronic dialysis and transplantation for all individuals in Canada.                                                                                                  |
| MOMBABY                                       | Contains all inpatient admission records for mothers and their newborns and links mothers and their newborns deterministically based on the maternal/newborn chart number.                   |

**Supplemental Table 2: Administrative data codes used in the study to identify children receiving dialysis for AKI**

|                 |                                                                                                                                                                                                                                                                                                                                                                                                                                                                                                                                                                                                                                                                                                                                                                                                                                                                                                                                                                                                                                                                                                                                                          |
|-----------------|----------------------------------------------------------------------------------------------------------------------------------------------------------------------------------------------------------------------------------------------------------------------------------------------------------------------------------------------------------------------------------------------------------------------------------------------------------------------------------------------------------------------------------------------------------------------------------------------------------------------------------------------------------------------------------------------------------------------------------------------------------------------------------------------------------------------------------------------------------------------------------------------------------------------------------------------------------------------------------------------------------------------------------------------------------------------------------------------------------------------------------------------------------|
| <b>HD codes</b> | <p><b>Acute Dialysis Codes</b><br/>           CIHI-DAD Procedure / Intervention Codes<br/>           5195: Hemodialysis (CCP)<br/>           1PZ21HQBR: hemodialysis (CCI)</p> <p>OHIP Fee Codes<br/>           R849: initial and acute HD (both medical and surgical components)<br/>           G323: Dialysis- haemodialysis- acute, repeat (max 3)<br/>           G325- HD, medical component alone</p> <p><b>Access Codes</b><br/>           OHIP Fee Codes<br/>           G324: Dialysis- haemodialysis- subclavian or jugular catheter for HD<br/>           G336: Dialysis- revision of G324<br/>           G327: insertion of femoral catheter for HD<br/>           G099: hemodialysis-insert of subclavian or perm. jugular catheter<br/>           R848: critical care dialysis cannula insertion under vision<br/>           G312: thrombolytic instillation into temporary or permanent catheter</p>                                                                                                                                                                                                                                        |
| <b>PD codes</b> | <p><b>Acute Dialysis Codes</b><br/>           CIHI-DAD Procedure / Intervention Codes<br/>           6698: Peritoneal dialysis (CCP)<br/>           1PZ21HPD4: Dialysis, peritoneal dialysis using dialysate (CCI)</p> <p>OHIP Fee Codes<br/>           G330: Peritoneal dialysis - Acute (up to 48 hrs)<br/>           G331: Peritoneal dialysis - Repeat acute (up to 48 hrs) max. 3</p> <p><b>Access Codes</b><br/>           CIHI-DAD Procedure / Intervention Codes<br/>           1OT53DATS: Implantation of internal device, abdominal cavity, of catheter (peritoneal dialysis) using endoscopic (laparoscopic) approach (CCI)<br/>           1OT53HATS: Implantation of internal device, abdominal cavity, of catheter (peritoneal dialysis) using percutaneous (incision) approach (CCI)<br/>           1OT53LATS: Implantation of internal device, abdominal cavity, of catheter (peritoneal dialysis) using open (laparotomy) approach (CCI)</p> <p>OHIP Fee Codes<br/>           R852: Peritoneal dialysis - insert peritoneal cannula by laparotomy<br/>           R853: Peritoneal dialysis - insert peritoneal cannula by laparotomy</p> |

|                   |                                                                                                                                                                                                                                                                                                                                                                                                                                                                                                                                                                                                                                                                                                                                                                                                   |
|-------------------|---------------------------------------------------------------------------------------------------------------------------------------------------------------------------------------------------------------------------------------------------------------------------------------------------------------------------------------------------------------------------------------------------------------------------------------------------------------------------------------------------------------------------------------------------------------------------------------------------------------------------------------------------------------------------------------------------------------------------------------------------------------------------------------------------|
| <b>CKRT codes</b> | <b>Acute Dialysis Codes:</b><br>CIHI-DAD Procedure / Intervention Codes<br>1PZ21HQBS: Dialysis, continuous venovenous hemodialysis (CCI)<br><br>OHIP Fee Codes<br>G082: Cont.venovenous haemodiafiltration- initial and acute<br>G083: Cont.venovenous haemodialysis- initial and acute<br>G085: Cont.venovenous haemofiltration- initial and acute<br>G090: Venovenous slow cont.ultrafiltration- initial and acute<br>G091: Cont.arteriovenous haemodialysis-intial and acute<br>G092: Cont.arteriovenous haemodiafiltrat'n- initial and acute<br>G093: Haemodiafiltration-contin. Initial & Acute<br>G095: Slow continuous ultrafiltration- initial & acute<br>G294: Arteriovenous slow cont. ultrafiltration- Initial & acute<br>G295: Cont. arteriovenous-haemofiltration- intial and acute) |
|-------------------|---------------------------------------------------------------------------------------------------------------------------------------------------------------------------------------------------------------------------------------------------------------------------------------------------------------------------------------------------------------------------------------------------------------------------------------------------------------------------------------------------------------------------------------------------------------------------------------------------------------------------------------------------------------------------------------------------------------------------------------------------------------------------------------------------|

CIHI-DAD: Canadian Institutes for Health Information's Discharge Abstract Database

CCI: Canadian Classification of Interventions

CCP: Canadian Classification of Procedures

CKRT: Chronic Kidney Replacement Therapy

HD: Hemodialysis

OHIP: Ontario Health Insurance Plan

PD: Peritoneal Dialysis

**Supplemental Table 3: Proportion of neonates and children with dialysis-receiving AKI in various time-periods stratified by the cardiac surgery status**

|                                                              | Neonates  |           |           | Children  |           |           |           |
|--------------------------------------------------------------|-----------|-----------|-----------|-----------|-----------|-----------|-----------|
|                                                              | 1996-2001 | 2002-2008 | 2009-2015 | 1996-2001 | 2002-2005 | 2006-2009 | 2010-2015 |
| <b>Cardiac surgery</b>                                       |           |           |           |           |           |           |           |
| At least one acute dialysis (HD, PD, CKRT) code <sup>1</sup> | 17 (100%) | 35 (14%)  | 54 (45%)  | 30 (83%)  | 43 (45%)  | 54 (68%)  | 122 (79%) |
| HD access code & no acute dialysis code*                     | 0         | 0         | 0         | 0         | 0         | 0         | 0         |
| PD access code & no acute dialysis code*                     | 0         | 215 (86%) | 67 (55%)  | 6 (17%)   | 52 (55%)  | 25 (32%)  | 32 (21%)  |
| * no code small cell                                         |           |           |           |           |           |           |           |
| <b>No cardiac surgery</b>                                    |           |           |           |           |           |           |           |
| At least one acute dialysis (HD, PD, CKRT) code              | >35       | 31 (54%)  | 38 (84%)  | >460      | 163 (94%) | 156 (92%) | 212 (96%) |
| HD access code & no acute dialysis code*                     | 0         | 0         | 0         | 0         | 11 (6%)   | 13 (8%)   | 0         |
| PD access code & no acute dialysis code*                     | <6        | 26 (46%)  | 7 (16%)   | <6        |           |           | 9 (4%)    |

<sup>1</sup>For acute dialysis and access codes, please see Supplemental Table 2 above.

CKRT: Chronic Kidney Replacement Therapy

HD: Hemodialysis

PD: Peritoneal Dialysis

**Supplemental Table 4: Most prevalent diagnoses during a hospital stay for children who received dialysis for AKI in Ontario between April 1, 1996 and March 31, 2015**

| Most prevalent diagnoses during hospital stay, n (%)                     | 1996-2001 | 2002-2005        | 2006-2009        | 2010-2014        |
|--------------------------------------------------------------------------|-----------|------------------|------------------|------------------|
| Total                                                                    | 502       | 269              | 248              | 375              |
| 1. Acute appendicitis                                                    | 155 30.9% |                  |                  |                  |
| Congenital malformations of cardiac septa                                |           | 33 12.3%         | 25 10.1%         | 84 22.4%         |
| 2. Acquired hemolytic anemias                                            | 47 9.4%   | 29 10.8%         |                  | 27 7.2%          |
| Acute renal failure                                                      |           |                  | 23 9.3%          |                  |
| 3. Non-inflammatory disorders of ovary fallopian tube and broad ligament | 22 4.4%   |                  |                  |                  |
| Congenital malformations of cardiac chambers and connections             |           | 22 8.2%          |                  |                  |
| Acquired haemolytic anaemia                                              |           |                  | 21 8.5%          |                  |
| Acute renal failure                                                      |           |                  |                  | 17 4.5%          |
| 4. Anomalies of bulbus cordis and cardiac septal closure                 | 22 4.4%   |                  |                  |                  |
| Acute renal failure                                                      |           | 19 7.1%          |                  |                  |
| Congenital malformations of cardiac chambers and connections             |           |                  | 12 4.8%          | 11 2.9%          |
| 5. Benign neoplasm of ovary                                              | 18 3.6%   |                  |                  |                  |
| Other septicaemia                                                        |           | 8 3.0%           | 7 2.8%           |                  |
| Lymphoid Leukemia                                                        |           |                  |                  |                  |
| Streptococcal septicaemia                                                |           |                  |                  | 10 2.7%          |
| 6. Acute renal failure                                                   | 10 2.0%   |                  |                  |                  |
| Lymphoid leukaemia                                                       |           | 8 3.0%           |                  |                  |
| Congenital malformations of great arteries                               |           |                  | 7 2.8%           |                  |
| Congenital malformations of pulmonary and tricuspid valves               |           |                  |                  | 10 2.7%          |
| 7. Injury to gastrointestinal tract                                      | 10 2.0%   |                  |                  |                  |
| Congenital malformations of great arteries                               |           | 7 2.6%           |                  |                  |
| Diffuse non-Hodgkin's lymphoma                                           |           |                  | 7 2.8%           |                  |
| Lymphoid leukaemia                                                       |           |                  |                  | 8 2.1%           |
| 8. Lymphoid leukemia                                                     | 9 1.8%    |                  | 6 2.4%           |                  |
| Cardiomyopathy                                                           |           | 6 2.2%           |                  |                  |
| Hepatic failure, other                                                   |           |                  |                  | 8 2.1%           |
| 9. Other congenital anomalies of heart                                   | 9 1.8%    | N/A <sup>a</sup> | N/A <sup>a</sup> | N/A <sup>a</sup> |
| 10. Malignant neoplasm of ovary and other uterine adnexa                 | 8 1.6%    | N/A <sup>a</sup> | N/A <sup>a</sup> | N/A <sup>a</sup> |

<sup>a</sup> Diagnoses with <6 people have been suppressed due to ICES privacy policies.

*Supplemental material is neither peer-reviewed nor thoroughly edited by CJASN. The authors alone are responsible for the accuracy and presentation of the material.*

Note: As the 10 most prevalent diagnoses for children hospitalized with AKI changed across the study years, we have represented this using dotted lines. For example, in 1996-2001, the most prevalent diagnosis was acute appendicitis, but for the remaining study years it was congenital malformations of cardiac septa. As such, some diagnoses appear multiple times in the table based on the prevalence for that time period. For example, acute renal failure was the second most prevalent diagnosis in 2006-2009 but was the third most prevalent in 2010-2014.

*Supplemental material is neither peer-reviewed nor thoroughly edited by CJASN. The authors alone are responsible for the accuracy and presentation of the material.*

**Supplemental Table 5: Risk of 30-day mortality among hospitalized children after dialysis-receiving AKI stratified by dialysis modality**

|                   |             |              |               | Total          |
|-------------------|-------------|--------------|---------------|----------------|
|                   | PD          | HD           | CKRT          | Total          |
| Children (n=1394) | 55/655 (8%) | 64/346 (19%) | 146/393 (37%) | 265/1394 (19%) |

CKRT: Chronic Kidney Replacement Therapy

HD: Hemodialysis

PD: Peritoneal Dialysis

**Supplemental Figure 1: Cohort creation for children to assess incidence of dialysis-receiving acute kidney injury for the fiscal year April 1, 2014 to March 31, 2015**

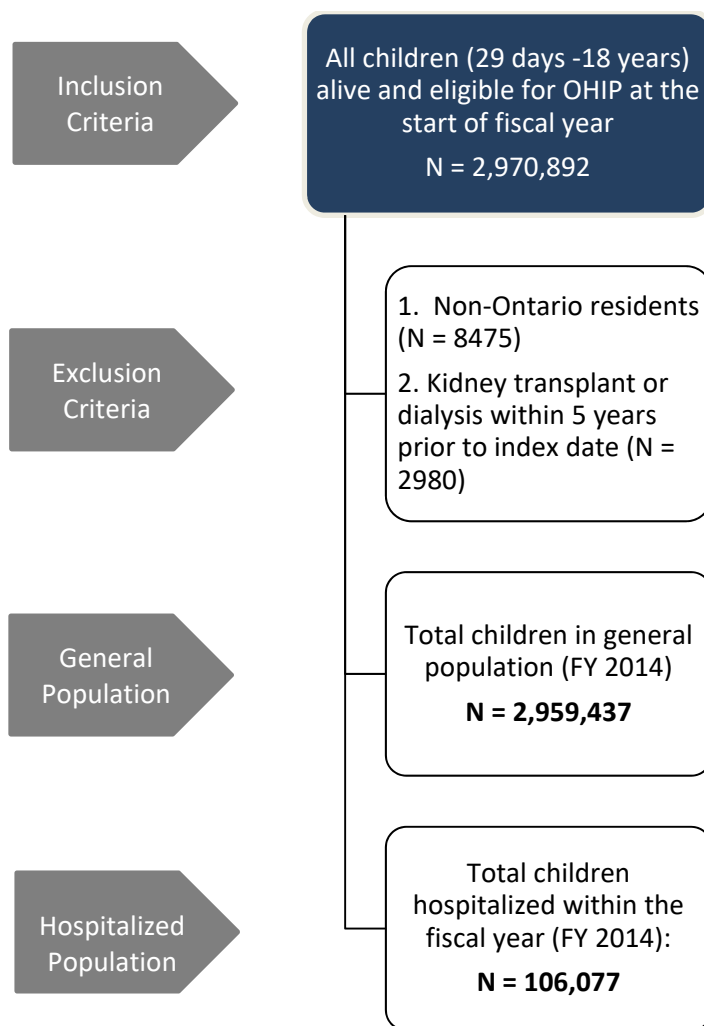

**Supplemental Figure 2: Incidence of dialysis-receiving acute kidney injury among total pediatric population between April 1, 1996 and March 31, 2015 in Ontario**

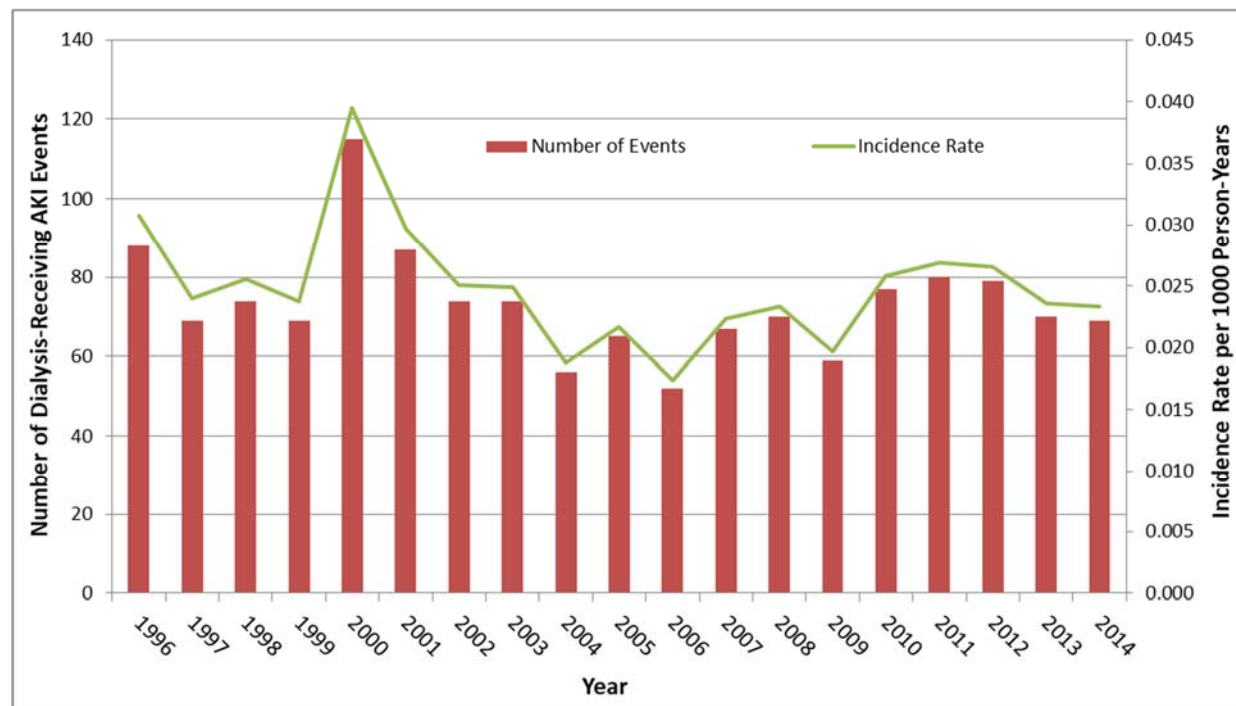

Abbreviations: AKI, acute kidney injury.

**Supplemental Figure 3: Incidence of dialysis-receiving acute kidney injury (defined using acute dialysis or access codes) among hospitalized neonates between April 1, 1996 and March 31, 2015 in Ontario**

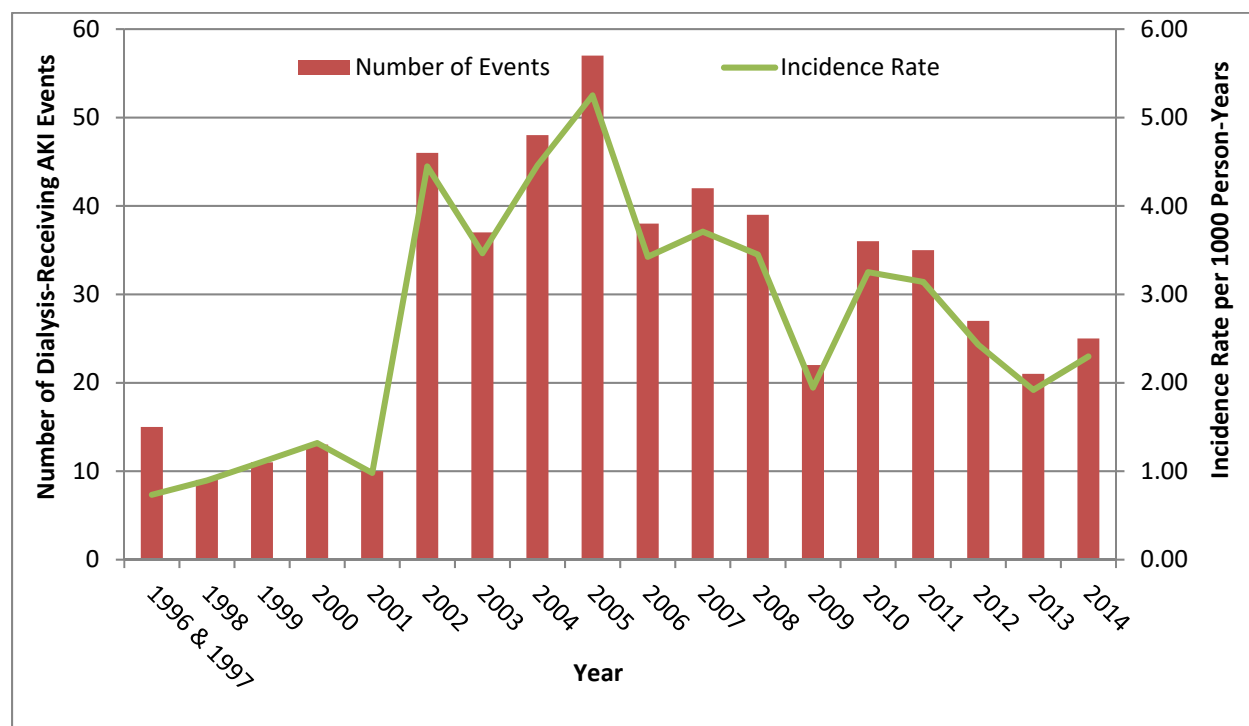

Abbreviations: AKI, acute kidney injury.

**Supplemental Figure 4: Incidence of dialysis-receiving AKI (defined using only acute dialysis codes) among hospitalized children (n=1249) between April 1, 1996 and March 31, 2015 in Ontario**

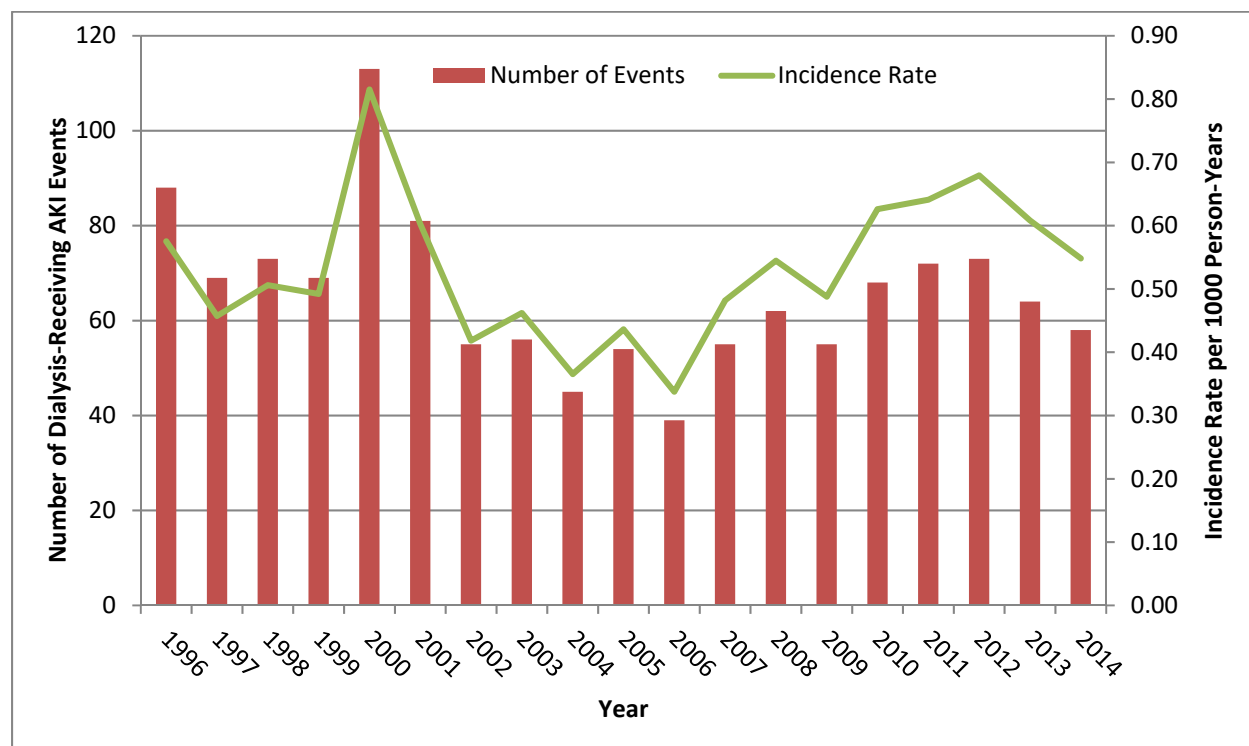

Abbreviations: AKI, acute kidney injury.

**Supplemental Figure 5: Incidence of dialysis-receiving AKI (defined using acute dialysis or access codes) among hospitalized children not receiving cardiac surgery (n=1030) between April 1, 1996 and March 31, 2015 in Ontario**

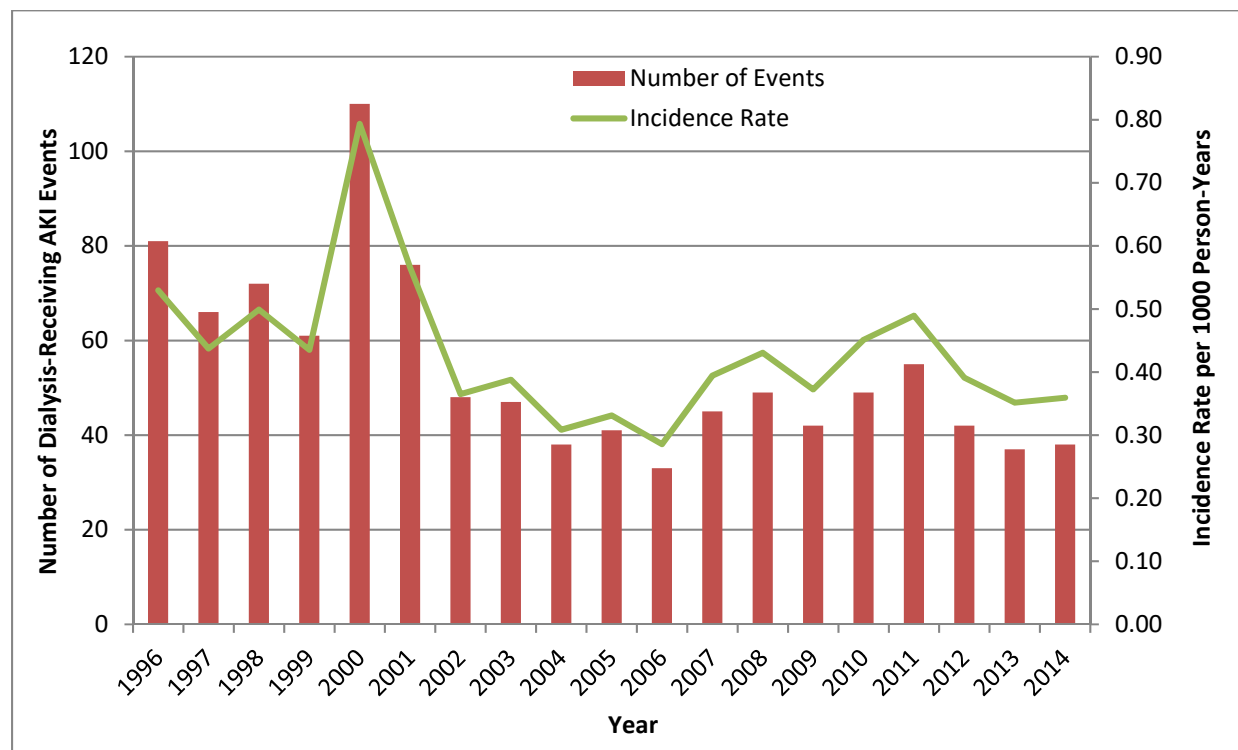

Abbreviations: AKI, acute kidney injury.

**Supplemental Figure 6: Incidence of dialysis-receiving AKI (defined using AKI diagnosis combined with acute dialysis codes) among hospitalized children (n=455) between April 1, 1996 and March 31, 2015 in Ontario**

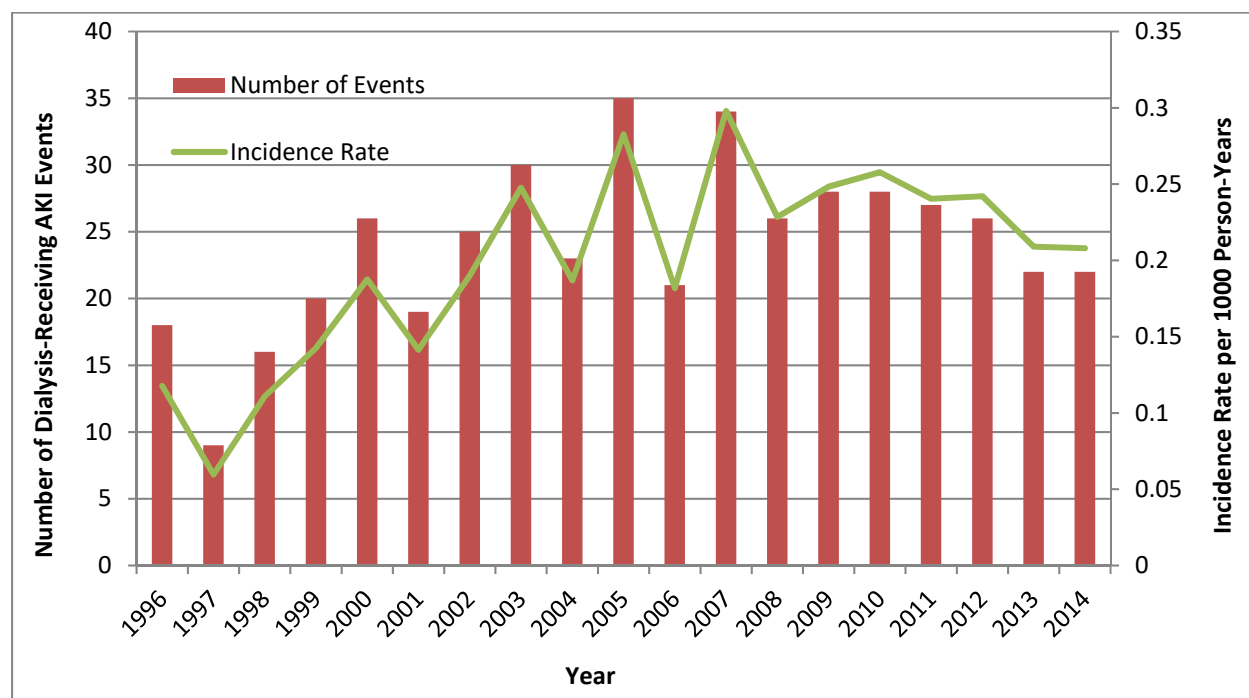

Abbreviations: AKI, acute kidney injury.
